# Supplementary material for: Ion Beam Assisted E-Beam Deposited TiN Microelectrodes—Applied to Neuronal Cell Culture Medium Evaluation
Source: PubMed Central journal article supplement (PMC6290344; doi:10.3389/fnins.2018.00882), 2018-12-04
Supplement: Table_1.pdf [file Table_1.pdf]

## Supplementary Material

### Ion beam assisted e-beam deposited TiN microelectrodes – applied to neuronal cell culture medium evaluation

Tomi Ryyänen\*, Maria Toivanen, Turkka Salminen, Laura Ylä-Outinen, Susanna Narkilahti, Jukka Leikkala

\* Correspondence: Tomi Ryyänen: tomi.ryynanen@tut.fi

#### 1 Supplementary Tables

**Table 1** | Additional MEA analysis results of spikes and bursts on each MEA type and medium combination. Time points: M1 = 6 days, M2 = 11 days, M3 = 13 days, M4 = 18 days, and M5 = 19-20 days.

| Time point and MEA type | Medium | Median spike frequency |       |      |     |       | Median spikes |        |       |       |       | Median spike frequency |       |      |     |       |
|-------------------------|--------|------------------------|-------|------|-----|-------|---------------|--------|-------|-------|-------|------------------------|-------|------|-----|-------|
|                         |        | Median                 | Range | Mean | SD  | p     | Median        | Range  | Mean  | SD    | p     | Median                 | Range | Mean | SD  | p     |
|                         |        | in burst (Hz)          |       |      |     |       | per burst     |        |       |       |       | in burst (Hz)          |       |      |     |       |
|                         |        |                        |       |      |     |       |               |        |       |       |       |                        |       |      |     |       |
| M1                      | NDM    | 7                      | 70    | 19   | 21  | 0,374 | 820           | 56616  | 6259  | 14229 | 0,531 | 5                      | 160   | 22   | 41  | 0,611 |
|                         | BMT    | BPH                    | 10    | 681  | 91  | 205   | 665           | 14912  | 2448  | 3962  |       | 6                      | 75    | 13   | 18  |       |
| M2                      | NDM    | 8                      | 748   | 57   | 163 | 0,064 | 1588          | 46735  | 6598  | 11259 | 0,010 | 12                     | 347   | 36   | 74  | 0,031 |
|                         | BMT    | BPH                    | 13    | 748  | 89  | 195   | 386           | 27622  | 1397  | 3861  |       | 5                      | 49    | 8    | 8   |       |
| M3                      | NDM    | 17                     | 796   | 97   | 223 | 0,779 | 188           | 10596  | 1218  | 2510  | 0,138 | 4                      | 34    | 7    | 8   | 0,057 |
|                         | BMT    | BPH                    | 16    | 609  | 69  | 161   | 403           | 42855  | 3766  | 9824  |       | 6                      | 126   | 12   | 20  |       |
| M4                      | NDM    | 14                     | 361   | 30   | 65  | 0,085 | 402           | 52329  | 3193  | 9304  | 0,087 | 6                      | 83    | 12   | 18  | 0,100 |
|                         | BMT    | BPH                    | 19    | 997  | 51  | 155   | 265           | 3573   | 515   | 679   |       | 5                      | 24    | 6    | 4   |       |
| M5                      | NDM    | 12                     | 68    | 18   | 17  | 0,001 | 472           | 141334 | 8995  | 34130 | 0,012 | 5                      | 411   | 30   | 99  | 0,577 |
|                         | BMT    | BPH                    | 31    | 998  | 72  | 161   | 189           | 41494  | 1124  | 5275  |       | 5                      | 88    | 8    | 12  |       |
| M1                      | NDM    | 7                      | 581   | 86   | 191 | 0,208 | 1774          | 10517  | 2962  | 3610  | 0,238 | 7                      | 40    | 12   | 12  | 0,208 |
|                         | MCS    | BPH                    | 17    | 351  | 68  | 121   | 441           | 2803   | 859   | 1014  |       | 5                      | 22    | 7    | 7   |       |
| M2                      | NDM    | 6                      | 114   | 16   | 31  | 0,020 | 1921          | 295612 | 26903 | 81151 | 0,087 | 7                      | 423   | 45   | 115 | 0,265 |
|                         | MCS    | BPH                    | 12    | 731  | 59  | 162   | 470           | 6354   | 1053  | 1784  |       | 6                      | 91    | 10   | 20  |       |
| M3                      | NDM    | 11                     | 105   | 24   | 28  | 0,887 | 452           | 33559  | 2646  | 7907  | 0,558 | 5                      | 80    | 10   | 19  | 0,344 |
|                         | MCS    | BPH                    | 14    | 315  | 26  | 55    | 432           | 55976  | 4131  | 11474 |       | 5                      | 116   | 15   | 25  |       |
| M4                      | NDM    | 15                     | 40    | 19   | 13  | 0,371 | 294           | 1124   | 358   | 315   | 0,397 | 4                      | 5     | 4    | 2   | 0,008 |
|                         | MCS    | BPH                    | 18    | 998  | 49  | 162   | 319           | 4175   | 711   | 1066  |       | 6                      | 65    | 9    | 11  |       |
| M5                      | NDM    | 11                     | 41    | 17   | 15  | 0,145 | 354           | 2073   | 613   | 773   | 0,413 | 5                      | 6     | 5    | 2   | 0,809 |
|                         | MCS    | BPH                    | 25    | 85   | 33  | 26    | 206           | 21884  | 1595  | 4559  |       | 4                      | 200   | 14   | 38  |       |

NDM = Neuronal differentiation Medium, BHP = BrainPhys medium, BMT = BMT produced IBAD-TiN MEAs, MCS = MEAs from Multi Channel Systems GmbH, SD = standard deviation, p = p-value calculated pairwise between NMD and BPH using Mann-Whitney U-test ( $p \leq 0.05$  is considered as significant and marked as yellow).

**Table 2** | Additional MEA analysis results of active and burst detecting electrodes on each MEA type and medium combination. Time points: M1 = 6 days, M2 = 11 days, M3 = 13 days, M4 = 18 days, and M5 = 19-20 days.

| Time point and MEA type | Medium  | Active electrodes/ network (%)         |       |      |    |        | Spike frequency in active electrodes (Hz)         |        |       |       |       |
|-------------------------|---------|----------------------------------------|-------|------|----|--------|---------------------------------------------------|--------|-------|-------|-------|
|                         |         | Median                                 | Range | Mean | SD | p      | Median                                            | Range  | Mean  | SD    | p     |
| M1                      | NDM     | 11                                     | 56    | 17   | 13 | 0.001  | 0.389                                             | 6.377  | 1.045 | 1.401 | 0.988 |
|                         | BMT BPH | 33                                     | 67    | 31   | 17 |        | 0.360                                             | 6.054  | 0.963 | 1.300 |       |
| M2                      | NDM     | 33                                     | 78    | 34   | 18 | 0.007  | 0.168                                             | 11.028 | 1.035 | 1.972 | 0.001 |
|                         | BMT BPH | 56                                     | 78    | 51   | 23 |        | 0.418                                             | 15.648 | 1.395 | 2.394 |       |
| M3                      | NDM     | 33                                     | 56    | 31   | 16 | 0.068  | 0.933                                             | 7.415  | 1.575 | 1.849 | 0.938 |
|                         | BMT BPH | 44                                     | 78    | 43   | 22 |        | 0.712                                             | 22.358 | 1.940 | 3.088 |       |
| M4                      | NDM     | 22                                     | 89    | 27   | 22 | <0.001 | 0.748                                             | 8.375  | 1.592 | 1.998 | 0.243 |
|                         | BMT BPH | 56                                     | 89    | 50   | 22 |        | 0.898                                             | 25.207 | 2.462 | 3.823 |       |
| M5                      | NDM     | 28                                     | 67    | 28   | 19 | 0.011  | 0.358                                             | 8.742  | 1.474 | 1.964 | 0.265 |
|                         | BMT BPH | 44                                     | 89    | 44   | 22 |        | 0.720                                             | 21.703 | 2.483 | 4.292 |       |
| M1                      | NDM     | 11                                     | 33    | 10   | 10 | 0.006  | 0.342                                             | 5.664  | 1.172 | 1.476 | 0.002 |
|                         | MCS BPH | 17                                     | 67    | 22   | 17 |        | 0.080                                             | 4.327  | 0.399 | 0.751 |       |
| M2                      | NDM     | 11                                     | 33    | 14   | 12 | 0.020  | 0.293                                             | 8.338  | 1.227 | 1.773 | 0.683 |
|                         | MCS BPH | 22                                     | 67    | 26   | 19 |        | 0.295                                             | 8.914  | 0.901 | 1.550 |       |
| M3                      | NDM     | 11                                     | 44    | 16   | 13 | 0.009  | 0.477                                             | 8.890  | 1.237 | 1.853 | 0.777 |
|                         | MCS BPH | 22                                     | 78    | 29   | 20 |        | 0.583                                             | 8.480  | 1.092 | 1.489 |       |
| M4                      | NDM     | 11                                     | 44    | 15   | 12 | <0.001 | 0.167                                             | 9.163  | 1.064 | 2.094 | 0.648 |
|                         | MCS BPH | 28                                     | 89    | 43   | 30 |        | 0.235                                             | 20.448 | 1.782 | 3.722 |       |
| M5                      | NDM     | 11                                     | 44    | 14   | 14 | <0.001 | 0.202                                             | 11.468 | 1.031 | 2.447 | 0.705 |
|                         | MCS BPH | 22                                     | 89    | 35   | 24 |        | 0.138                                             | 14.178 | 1.676 | 3.181 |       |
|                         |         | Burst detecting electrodes/network (%) |       |      |    |        | Total bursts in burst detecting electrodes/10 min |        |       |       |       |
| M1                      | NDM     | 11                                     | 22    | 7    | 7  | 0.141  | 45                                                | 169    | 55    | 49    | 0.498 |
|                         | BMT BPH | 11                                     | 56    | 11   | 13 |        | 48                                                | 395    | 83    | 89    |       |
| M2                      | NDM     | 0                                      | 56    | 9    | 13 | <0.001 | 60                                                | 746    | 116   | 162   | 0.576 |
|                         | BMT BPH | 22                                     | 67    | 25   | 19 |        | 87                                                | 657    | 127   | 147   |       |
| M3                      | NDM     | 11                                     | 33    | 14   | 11 | 0.024  | 77                                                | 662    | 156   | 168   | 0.853 |
|                         | BMT BPH | 22                                     | 56    | 24   | 15 |        | 107                                               | 1456   | 156   | 210   |       |
| M4                      | NDM     | 11                                     | 44    | 12   | 13 | <0.001 | 151                                               | 635    | 186   | 170   | 0.953 |
|                         | BMT BPH | 22                                     | 67    | 30   | 17 |        | 127                                               | 1179   | 203   | 214   |       |
| M5                      | NDM     | 6                                      | 44    | 10   | 13 | 0.009  | 160                                               | 552    | 193   | 154   | 0.835 |

|     |     |    |    |    |    |       |     |      |     |     |       |
|-----|-----|----|----|----|----|-------|-----|------|-----|-----|-------|
| BMT | BPH | 22 | 56 | 24 | 17 |       | 141 | 2031 | 268 | 365 |       |
| M1  | NDM | 0  | 22 | 4  | 7  | 0,716 | 68  | 253  | 86  | 78  | 0,624 |
| MCS | BPH | 0  | 22 | 4  | 6  |       | 84  | 391  | 116 | 121 |       |
| M2  | NDM | 0  | 22 | 5  | 7  | 0,091 | 93  | 402  | 119 | 112 | 0,650 |
| MCS | BPH | 11 | 44 | 9  | 11 |       | 87  | 628  | 115 | 145 |       |
| M3  | NDM | 0  | 33 | 7  | 9  | 0,007 | 69  | 365  | 118 | 117 | 0,585 |
| MCS | BPH | 11 | 56 | 15 | 13 |       | 67  | 593  | 97  | 121 |       |
| M4  | NDM | 0  | 22 | 4  | 7  | 0,004 | 104 | 659  | 231 | 223 | 0,447 |
| MCS | BPH | 11 | 67 | 17 | 20 |       | 99  | 670  | 170 | 169 |       |
| M5  | NDM | 0  | 22 | 2  | 5  | 0,001 | 236 | 989  | 422 | 427 | 0,173 |
| MCS | BPH | 11 | 44 | 13 | 14 |       | 126 | 918  | 216 | 247 |       |

NDM = Neuronal differentiation Medium, BHP = BrainPhys medium, BMT = BMT produced IBAD-TiN MEAs, MCS = MEAs from Multi Channel Systems GmbH, SD = standard deviation, p= p-value calculated pairwise between NMD and BPH using Mann-Whitney U-test ( $p \leq 0.05$  is considered as significant and marked as yellow).

## 2 Supplementary videos

**Video 1** | Example of network growth on a control cell culture plastic plate for over 26 hours after 10 days in adherent culture in NDM medium.

Video1.avi

**Video 2** | Example of network growth on a control cell culture plastic plate for over 26 hours after 10 days in adherent culture in BPH medium.

Video2.avi

**Video 3** | Example of network growth on a control cover slip for over 26 hours after 10 days in adherent culture in BPH medium.

Video3.avi
